# Supplementary material for: Self-rotating stir mesh screen sorptive extraction for analyzing chlorpyrifos by ion mobility spectrometry
Source: Royal Society of Chemistry journal article supplement (doi:10.1039/d1ay00595b), 2021-01-01
Supplement: d1ay00595b1.pdf [file d1ay00595b1.pdf]

**Supporting Information**

**For**

**Self-rotating Stir Mesh Screen Sorptive Extraction for analyzing Chlorpyrifos by Ion  
Mobility Spectrometry**

Mansoure Kermani, Mohammad T. Jafari\*, Mohammad Saraji

*Department of Chemistry, Isfahan University of Technology, Isfahan 84156-83111, Iran*

---

\*Corresponding author: Tel.: +98-313-391-2351, Fax: +98-313-391-2350  
E-mail: jafari@cc.iut.ac.ir.

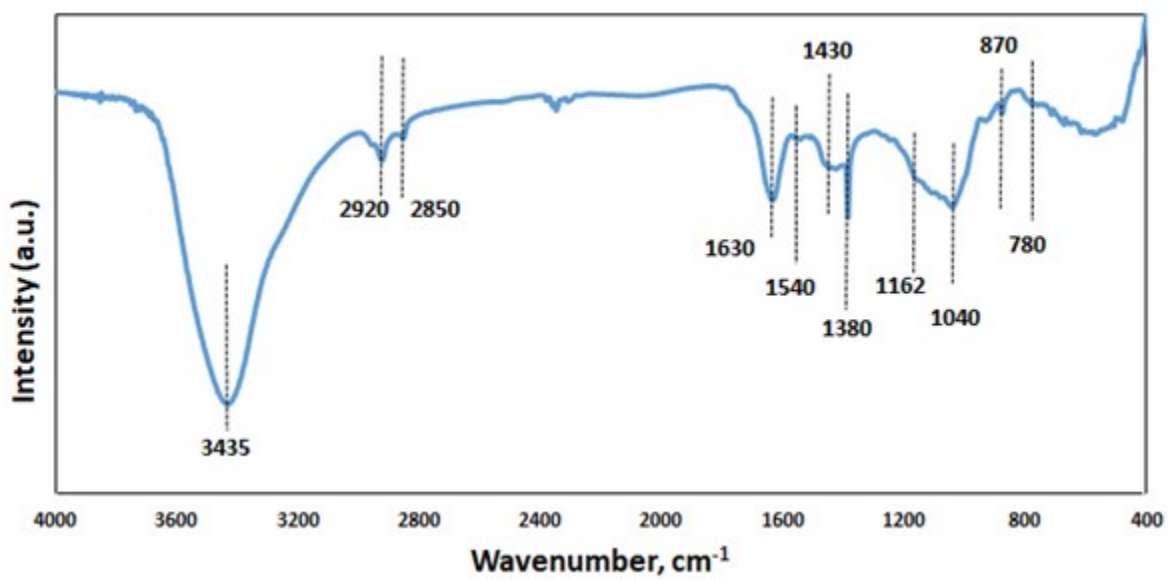

Figure S-1: FT-IR spectrum of the polypyrrole.

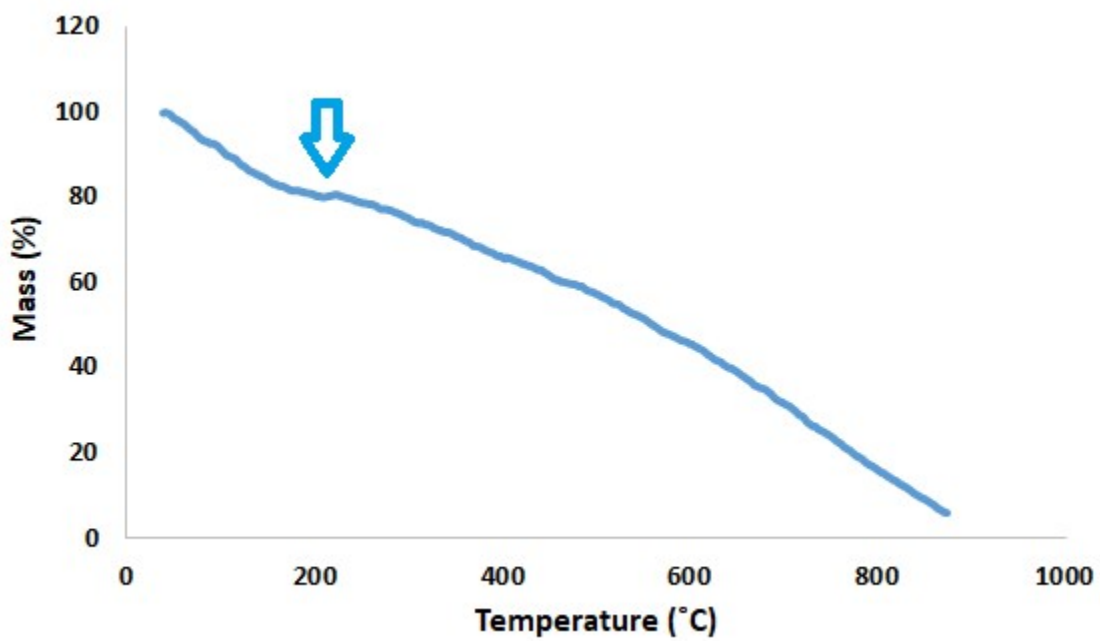

Figure S-2: TGA curve of the polypyrrole, where as a major mass loss occurred at area around 200 °C (marked by the blue down arrow).

Table S-1: Variables, their levels and symbols which were selected for the CCD in electrodeposition step

| Variable                                         | Symbol | Levels    |      |      |      |           |
|--------------------------------------------------|--------|-----------|------|------|------|-----------|
|                                                  |        | $-\alpha$ | $-1$ | $0$  | $+1$ | $+\alpha$ |
| Pyrrole concentration (mol L <sup>-1</sup> )     | $P$    | 0.02      | 0.05 | 0.11 | 0.17 | 0.2       |
| Oxalic acid concentration (mol L <sup>-1</sup> ) | $O$    | 0.15      | 0.32 | 0.82 | 1.3  | 1.5       |
| Electropolymerization time (s)                   | $t_p$  | 600       | 1040 | 2100 | 3160 | 3600      |

Table S-2: Variables, their levels and symbols which were selected for the CCD in extraction step

| Variable                                         | Symbol | Levels |      |     |      |      |
|--------------------------------------------------|--------|--------|------|-----|------|------|
|                                                  |        | $-a$   | $-1$ | $0$ | $+1$ | $+a$ |
| Time of extraction (min)                         | $t_e$  | 10     | 17   | 27  | 38   | 45   |
| Temperature of extraction ( $^{\circ}\text{C}$ ) | $T$    | 25     | 35   | 50  | 65   | 75   |
| Stirring rate (rpm)                              | $R$    | 200    | 400  | 700 | 1000 | 1200 |
| Salt concentration ( $\text{g mL}^{-1}$ )        | $S$    | 0      | 0.04 | 0.1 | 0.16 | 0.2  |

Table S-3: Analytical parameters of the proposed method obtained for pure water samples spiked with chlorpyrifos.

| LDR <sup>a</sup><br>( $\mu\text{g L}^{-1}$ ) | R <sup>2</sup> <sup>b</sup> | LOD <sup>c</sup><br>( $\mu\text{g L}^{-1}$ ) | LOQ <sup>d</sup><br>( $\mu\text{g L}^{-1}$ ) | Repeatability (%) <sup>e</sup> |    |                        |    | Mesh-to-mesh<br>reproducibility <sup>e</sup> (%) |
|----------------------------------------------|-----------------------------|----------------------------------------------|----------------------------------------------|--------------------------------|----|------------------------|----|--------------------------------------------------|
|                                              |                             |                                              |                                              | Intra-day <sup>f</sup>         |    | Inter-day <sup>f</sup> |    |                                                  |
|                                              |                             |                                              |                                              | 0.5                            | 10 | 0.5                    | 10 |                                                  |
| 0.1-20                                       | 0.9984                      | 0.035                                        | 0.1                                          | 3                              | 2  | 7                      | 8  | 4                                                |

<sup>a</sup> Linear dynamic range.

<sup>b</sup> Correlation coefficient

<sup>c</sup> Limit of detection.

<sup>d</sup> Limit of quantification.

<sup>e</sup> Relative standard deviation.

<sup>f</sup> Intra-day and inter-day precision were calculated by analyzing pure water samples spiked at 0.5 and 10  $\mu\text{g L}^{-1}$  within one day (n=3) and over a period of three days, respectively.
